# Supplementary material
Source: PubMed Central journal article supplement (PMC6704753)
Supplement: jamadermatol-155-1129-s001.pdf [file jamadermatol-155-1129-s001.pdf]

## Supplementary Online Content

Gorbatenko-Roth K, Prose N, Kundu RV, Patterson S. Assessment of black patients' perception of their dermatology care. *JAMA Dermatol*. Published online August 21, 2019.  
doi:10.1001/jamadermatol.2019.2063

**eAppendix.** Northwestern Center for Ethnic Skin (NCES) Patient Study: Brief Demographic Survey

This supplementary material has been provided by the authors to give readers additional information about their work.

Northwestern Center for Ethnic Skin (NCES) Patient Study  
Brief Demographic Survey

*For the following questions, please circle the correct answer or write in your response.*

Focus Group Date: \_\_\_\_\_ Focus Group Time: \_\_\_\_\_

About you:

1. Age: \_\_\_\_\_
2. Gender (Circle correct response):        M        F        Other: \_\_\_\_\_
3. Highest level of education:
  - a. Some high school
  - b. High school graduate or diploma completion (GED)
  - c. Some college or other post high-school education (VoTec, 2-year college)
  - d. Undergraduate degree from a 4-year college
  - e. Some graduate school
  - f. Graduate school degree

About your pre-NCES dermatology experiences:

4. Have you seen a dermatologist prior to being seen in the NCES? (Circle the correct response)
  - a. Yes
  - b. No

*If No, go to question 17*

*If yes, answer questions 5-16*

5. Approximately how many different dermatologists? (write in the number): \_\_\_\_\_
6. In which type of setting(s) did you see your previous dermatologists (select all that apply):
  - a. University clinic
  - b. Small private clinic office
  - c. Skin of color/ ethnic clinic elsewhere
  - d. Large dermatology practice clinic
7. What was the skin color of your past dermatologists? (select the best response)
  - a. All white
  - b. Most white with at least one a person of color

- c. Most persons of color
- d. All persons of color

*The next few questions ask about the care you received from your previous dermatologists.*

How satisfied were you with...

- 8. The overall care you received?
  - a. Very unsatisfied
  - b. Unsatisfied
  - c. Neither satisfied or unsatisfied
  - d. Satisfied
  - e. Very Satisfied
  
- 9. Your provider's cultural sensitivity for Black skin?
  - a. Very unsatisfied
  - b. Unsatisfied
  - c. Neither satisfied or unsatisfied
  - d. Satisfied
  - e. Very Satisfied
  
- 10. Your provider's knowledge about Black skin?
  - a. Very unsatisfied
  - b. Unsatisfied
  - c. Neither satisfied or unsatisfied
  - d. Satisfied
  - e. Very Satisfied
  
- 11. Your provider's knowledge about Black hair?
  - a. Very unsatisfied
  - b. Unsatisfied
  - c. Neither satisfied or unsatisfied
  - d. Satisfied
  - e. Very Satisfied
  
- 12. The actual change in the condition for which you seeing the dermatologist?
  - a. Very unsatisfied
  - b. Unsatisfied
  - c. Neither satisfied or unsatisfied
  - d. Satisfied
  - e. Very Satisfied

*How much do you agree with each of the following statements? My previous non-NCES dermatologist(s)....*

- 13. Showed me respect and dignity

- a. Strongly disagree
- b. Disagree
- c. Neither agree nor disagree
- d. Agree
- e. Strongly Agree

14. Understood me

- a. Strongly disagree
- b. Disagree
- c. Neither agree nor disagree
- d. Agree
- e. Strongly Agree

15. Was trustworthy

- a. Strongly disagree
- b. Disagree
- c. Neither agree nor disagree
- d. Agree
- e. Strongly Agree

16. Was well trained to treat Black patients

- a. Strongly disagree
- b. Disagree
- c. Neither agree nor disagree
- d. Agree
- e. Strongly Agree

About your Northwestern Ethnic Skin Center (NCES) experience

17. How did you learn about the NCES clinic?

- a. NCES advertising
- b. Dermatologist at other clinic
- c. Primary Care doctor
- d. Word of mouth
- e. Other: \_\_\_\_\_

18. Why did you choose the NCES clinic? \_\_\_\_\_

19. For about how long have you been attending the NCES clinic?

- a. Less than 1 month
- b. 3-5 months
- c. 6-9 months
- d. 9-12 months

- e. 1-2 years
- f. More than 2 years

20. Who is your NCES doctor?

- a. Dr. A
- b. Dr. B

21. Do you prefer to see an AA dermatologist?

- a. Yes
  - b. No
  - c. Why? Please explain your answer. \_\_\_\_\_
- 

*The next few questions ask about the care you received from the NCES.*

How satisfied were you with...

22. The overall care you received?

- a. Very unsatisfied
- b. Unsatisfied
- c. Neither satisfied or unsatisfied
- d. Satisfied
- e. Very Satisfied

23. Your provider's cultural sensitivity for black skin?

- a. Very unsatisfied
- b. Unsatisfied
- c. Neither satisfied or unsatisfied
- d. Satisfied
- e. Very Satisfied

24. Your provider's knowledge about black skin?

- a. Very unsatisfied
- b. Unsatisfied
- c. Neither satisfied or unsatisfied
- d. Satisfied
- e. Very Satisfied

25. Your provider's knowledge about black hair?

- a. Very unsatisfied
- b. Unsatisfied
- c. Neither satisfied or unsatisfied

- d. Satisfied
- e. Very Satisfied

26. The actual change in the condition for which you seeing the dermatologist?

- a. Very unsatisfied
- b. Unsatisfied
- c. Neither satisfied or unsatisfied
- d. Satisfied
- e. Very Satisfied

*How much do you agree with each of the following statements? My NCES dermatologist....*

27. Showed me respect and dignity

- a. Strongly disagree
- b. Disagree
- c. Neither agree nor disagree
- d. Agree
- e. Strongly Agree

28. Understood me

- a. Strongly disagree
- b. Disagree
- c. Neither agree nor disagree
- d. Agree
- e. Strongly Agree

29. Was trustworthy

- a. Strongly disagree
- b. Disagree
- c. Neither agree nor disagree
- d. Agree
- e. Strongly Agree

30. Was well trained to treat AA

- a. Strongly disagree
- b. Disagree
- c. Neither agree nor disagree
- d. Agree
- e. Strongly Agree

*This is the end of the Survey. Thank for completing it.*
